# Supplementary material for: The role and mechanism of noncoding RNAs in regulation of metabolic reprogramming in hepatocellular carcinoma
Source: PubMed Central journal article supplement — Int J Cancer. 2022 May 11;151(3):337–47. doi: 10.1002/ijc.34040 (PMC9325518; doi:10.1002/ijc.34040), 2022-05-11
Supplement: IJC-151-337-s001.pdf [file IJC-151-337-s001.pdf]

# **The role and mechanism of noncoding RNAs in regulation of metabolic reprogramming in hepatocellular carcinoma**

Wenwei Liao, Jinpeng Du, Zhen Wang, Qingbo Feng, Mingheng Liao,  
Huixian Liu, Kefei Yuan, Yong Zeng

**Supplementary tables**

**Table 1: ncRNAs dysregulated in HCC.**

| NcRNA category | NcRNA name  | Expression                    | Function                                     | Ref   |
|----------------|-------------|-------------------------------|----------------------------------------------|-------|
| <b>miRNA</b>   | miR-155     | up                            | Promotes proliferation, inhibits apoptosis   | 1     |
|                | miR-106b    | up                            | Promotes proliferation, inhibits apoptosis   | 2     |
|                | miR-125a    | down                          | Suppresses proliferation                     | 3     |
|                | miR-125b    | up                            | Promotes proliferation                       | 4     |
|                | miR-26a     | down                          | Suppresses angiogenesis                      | 5     |
|                | miR-504     | up                            | Promotes proliferation                       | 6     |
|                | miR-1207-5p | down                          | Inhibits growth and invasion                 | 7     |
|                | miR-449     | down                          | Suppresses proliferation                     | 8     |
|                | miR-384     | up                            | Promotes proliferation, metastasis           | 9     |
|                | miR-21      | up                            | Promotes proliferation                       | 10    |
|                | miR-221     | up                            | Promotes proliferation                       | 11    |
|                | miR-222     | up                            | Promotes proliferation, metastasis           | 12    |
|                | miR-122     | down                          | Promotes migration                           | 13    |
|                | miR-139     | down                          | Suppresses migration                         | 14    |
|                | miR-17      | down                          | Suppresses migration, invasion               | 15    |
|                | miR-375     | down                          | Inhibits proliferation, invasion             | 16    |
|                | miR-28-5p   | down                          | Inhibits metastasis                          | 17    |
|                | miR-124     | down                          | Suppresses migration                         | 18    |
|                | miR-199a-5p | down                          | Suppresses invasion                          | 19    |
|                | miR-200     | down                          | Inhibits migration                           | 20    |
|                | miR-96      | up                            | Promotes proliferation                       | 21    |
|                | miR-182     | up                            | Promotes proliferation                       |       |
| miR-151        | up          | Promotes invasion, metastasis | 22                                           |       |
| <b>lncRNA</b>  | HULC        | up                            | Promotes proliferation, metastasis           | 23    |
|                | linc01138   | up                            | Promotes proliferation, invasion             | 24    |
|                | linc00462   | down                          | Promotes proliferation                       | 25    |
|                | H19         | down                          | Inhibits proliferation, metastasis           | 26-27 |
|                | linc01419   | up                            | Promotes proliferation                       | 28    |
|                | lncUCA1     | up                            | Promotes proliferation                       | 29    |
|                | lncPANDA    | up                            | Promotes proliferation                       | 30    |
|                | lncHOTAIR   | up                            | Promotes metastasis                          | 31-34 |
|                | lncMALAT1   | up                            | Promotes proliferation, invasion, metastasis |       |
|                | lncMVIH     | up                            | Promotes metastasis                          |       |
|                | lncMEG3     | down                          | Inhibits proliferation                       |       |
|                | lncATB      | up                            | Promotes metastasis                          | 35    |
|                | lncMIAT     | up                            | Promotes proliferation, invasion             | 36    |

|                |             |                      |                                      |       |
|----------------|-------------|----------------------|--------------------------------------|-------|
|                | lncPDPK2P   | up                   | Promotes progression                 | 37    |
|                | MCM3APas1   | up                   | Promotes growth                      | 38    |
|                | CDKN2BAS    | up                   | Promotes metastasis                  | 39    |
|                | HOXD-AS1    | up                   | Promotes metastasis                  | 40    |
|                | lncRNA AY   | up                   | Promotes metastasis                  | 41    |
|                | lncELF209   | down                 | Inhibits progression                 | 42    |
|                | lncPCNAP1   | up                   | Enhances growth                      | 43    |
|                | lncID2-AS1  | down                 | Suppresses metastasis                | 44    |
|                | lncNBR2     | down                 | Inhibits tumorigenesis               | 45    |
|                | linc00662   | up                   | Promotes progression                 | 46    |
|                | lnc01093    | down                 | Suppresses progression               | 47    |
|                | lncUCID     | up                   | Promotes growth                      | 48    |
|                | lncCSMD1-1  | up                   | Promotes progression                 | 49    |
|                | linc01146   | down                 | Inhibits tumorigenesis               | 50    |
|                | lncCYTOR    | up                   | Promotes proliferation               | 51    |
| <b>circRNA</b> | circ000839  | up                   | Promotes invasion, migration         | 52    |
|                | circ0016788 | up                   | Promotes invasion, proliferation     | 53    |
|                | circ0067934 | up                   | Promotes migration and proliferation | 54    |
|                | circ0000673 | up                   | Promotes invasion, proliferation     | 55    |
|                | circHIPK3   | up                   | Promotes migration and proliferation | 56    |
|                | circCUL2    | up                   | Promotes proliferation, migration    | 57    |
|                | circLRIG3   | up                   | Facilitates progression              | 58    |
|                | circRHOT1   | up                   | Promotes growth and metastasis       | 59    |
|                | SMARCA5     | down                 | Inhibits growth and metastasis       | 60    |
|                | circCDR     | up                   | Promotes growth                      | 61    |
|                | circZEB1.33 | up                   | Promotes proliferation               | 62    |
|                | circSETD3   | down                 | Inhibits growth                      | 63    |
|                | circMTO1    | down                 | Inhibits progression                 | 64    |
|                | circFBLIM1  | up                   | Promotes proliferation               | 65    |
|                | circSMAD2   | up                   | Promotes proliferation               | 66    |
|                | circ5692    | down                 | Inhibits progression                 | 67    |
|                | circ100338  | up                   | Promotes metastasis                  | 68    |
|                | circ104348  | up                   | Promotes progression                 | 69    |
|                | circ104718  | up                   | Promotes progression                 | 70    |
|                | circ0001955 | up                   | Promotes, proliferation, migration   | 71-72 |
|                | circASAP1   | up                   | Promotes metastasis                  | 73    |
|                | circ103809  | up                   | Promoted development                 | 74    |
|                | circ0051443 | down                 | Suppresses progression               | 75    |
| circMMP2       | up          | Promotes metastasis  | 76                                   |       |
| TRIM33-12      | down        | Suppress progression | 77                                   |       |
| circ001306     | up          | Enhances growth      | 78                                   |       |

|               |            |      |                              |    |
|---------------|------------|------|------------------------------|----|
|               | circSOD2   | up   | Promotes progression         | 79 |
|               | circMRPS35 | up   | Promotes progression         | 80 |
|               | circKCNN2  | down | Suppresses progression       | 81 |
| <b>piRNA</b>  | piR-Hep1   | up   | Promotes growth, progression | 82 |
| <b>snoRNA</b> | snoRD113-1 | down | Suppresses growth            | 83 |
|               | snoRD126   | up   | Promotes growth              | 84 |

## References

- 1 Zhang Y, Wei W, Cheng N, et al. Hepatitis C virus-induced up-regulation of microRNA-155 promotes hepatocarcinogenesis by activating Wnt signaling. *Hepatology*. 2012;56(5):1631–40.
- 2 Shen G, Jia H, Tai Q, et al. MiR-106b down-regulates adenomatous polyposis coli and promotes cell proliferation in human hepatocellular carcinoma. *Carcinogenesis*. 2013;34(1):211–9.
- 3 Tang H, Li RP, Liang P, Zhou YL, Wang GW. miR-125a inhibits the migration and invasion of liver cancer cells via suppression of the PI3K/AKT/mTOR signaling pathway. *Oncol Lett* 2015; 10: 681-686
- 4 Le MT, Teh C, Shyh-Chang N, Xie H, Zhou B, Korzh V, Lodish HF, Lim B. MicroRNA-125b is a novel negative regulator of p53. *Genes Dev* 2009; 23: 862-876
- 5 Yang X, Zhang X F, Lu X, et al. MicroRNA - 26a suppresses angiogenesis in human hepatocellular carcinoma by targeting hepatocyte growth factor - cMet pathway[J]. *Hepatology*, 2014, 59(5): 1874-1885.
- 6 Hu W, Chan CS, Wu R, Zhang C, Sun Y, Song JS, Tang LH, Levine AJ, Feng Z. Negative regulation of tumor suppressor p53 by microRNA miR-504. *Mol Cell* 2010; 38: 689-699
- 7 Zhao G, Dong L, Shi H, et al. MicroRNA-1207-5p inhibits hepatocellular carcinoma cell growth and invasion through the fatty acid synthase-mediated Akt/mTOR signalling pathway. *Oncol Rep*.36, 2016,1709-16.
- 8 Zhang H, Feng Z, Huang R, et al. MicroRNA-449 suppresses proliferation of hepatoma cell lines through blockade lipid metabolic pathway related to SIRT1. *International Journal of Oncology*, 2014, 45(5):2143.
- 9 Bai PS, Xia N, Sun H, et al. Pleiotrophin, a target of miR-384, promotes proliferation, metastasis and lipogenesis in HBV-related hepatocellular carcinoma. *Cell Mol Med*. 21 (2017) 3023–3043.
- 10 Li CH, Xu F, Chow S, et al. Hepatitis B virus X protein promotes hepatocellular carcinoma transformation through interleukin-6 activation of microRNA-21 expression. *Eur J Cancer*, 2014, 50(15): 2560-2569.
- 11 Pineau P, Volinia S, McJunkin K, et al. miR-221 overexpression contributes to liver tumorigenesis[J]. *Proceedings of the National Academy of Sciences*, 2010, 107(1): 264-269.
- 12 Wong Q W L, Ching A K K, Chan A W H, et al. MiR-222 overexpression confers cell migratory advantages in hepatocellular carcinoma through enhancing AKT signaling[J]. *Clinical Cancer Research*, 2010, 16(3): 867-875.

- 13 Wang S C, Lin X L, Li J, et al. MicroRNA-122 triggers mesenchymal-epithelial transition and suppresses hepatocellular carcinoma cell motility and invasion by targeting RhoA[J]. *PloS one*, 2014, 9(7): e101330.
- 14 Wong C C L, Wong C M, Tung E K K, et al. The microRNA miR-139 suppresses metastasis and progression of hepatocellular carcinoma by down-regulating Rho-kinase 2[J]. *Gastroenterology*, 2011, 140(1): 322-331.
- 15 Lin Y H, Liao C J, Huang Y H, et al. Thyroid hormone receptor represses miR-17 expression to enhance tumor metastasis in human hepatoma cells[J]. *Oncogene*, 2013, 32(38): 4509-4518.
- 16 Liu AM, Poon RTP, Luk JM. MicroRNA-375 targets Hippo-signaling effector YAP in liver cancer and inhibits tumor properties. *Biochem Bioph Res Commun*. 2010;394(3):623–7.
- 17 Zhou S L, Hu Z Q, Zhou Z J, et al. miR - 28 - 5p - IL - 34 - macrophage feedback loop modulates hepatocellular carcinoma metastasis[J]. *Hepatology*, 2016, 63(5): 1560-1575.
- 18 Zheng F, Liao Y J, Cai M Y, et al. The putative tumour suppressor microRNA-124 modulates hepatocellular carcinoma cell aggressiveness by repressing ROCK2 and EZH2[J]. *Gut*, 2012, 61(2): 278-289.
- 19 Shen Q, Cicinnati VR, Zhang X, et al. Role of microRNA-199a-5p and discoidin domain receptor 1 in human hepatocellular carcinoma invasion[J]. *Mol Cancer*, 2010, 9(1): 1-12.
- 20 Wong C M, Wei L, Au S L K, et al. MiR-200b/200c/429 subfamily negatively regulates Rho/ROCK signaling pathway to suppress hepatocellular carcinoma metastasis[J]. *Oncotarget*, 2015, 6(15): 13658.
- 21 Wang TH, Yeh CT, Ho JY, et al. OncomiR miR - 96 and miR - 182 promote cell proliferation and invasion through targeting ephrinA5 in hepatocellular carcinoma. *Mol Carcinog*, 2016, 55(4): 366-375.
- 22 Ding J, Huang S, Wu S, et al. Gain of miR-151 on chromosome 8q24. 3 facilitates tumour cell migration and spreading through downregulating RhoGDIA. *Nat Cell Biol*, 2010, 12(4): 390-399.
- 23 Xiong H, Ni Z, He J, et al. LncRNA HULC triggers autophagy via stabilizing Sirt1 and attenuates the chemosensitivity of HCC cells. *Oncogene*, 2017, 36(25): 3528-3540.
- 24 Li Z, Zhang J, Liu X, et al. The LINC01138 drives malignancies via activating arginine methyltransferase 5 in hepatocellular carcinoma. *Nat Commun*, 2018, 9(1): 1-14.
- 25 Gong J, Qi X, Zhang Y, Yu Y, Lin X, Li H, et al. Long noncoding RNA linc00462 promotes hepatocellular carcinoma progression. *Biomed Pharmacother*. 2017;93:40–7.
- 26 Matouk IJ, Mezan S, Mizrahi A, Ohana P, Abu-Lail R, Fellig Y, et al. The oncofetal H19 RNA connection: hypoxia, p53 and cancer. *Biochim Biophys Acta*. 2010;1803(4):443–51.
- 27 Zhang L, Yang F U, Yuan J, et al. Epigenetic activation of the MiR-200 family contributes to H19-mediated metastasis suppression in hepatocellular carcinoma[J].

- Carcinogenesis, 2013, 34(3): 577-586.
- 28 Zhang H, Zhu C, Zhao Y, et al. Long non-coding RNA expression profiles of hepatitis C virus-related dysplasia and hepatocellular carcinoma. *Oncotarget*, 2015, 6(41): 43770.
- 29 Kamel MM, Matboli M, Sallam M, et al. Investigation of long noncoding RNAs expression profile as potential serum biomarkers in patients with hepatocellular carcinoma. *Transl Res*, 2016, 168: 134-145.
- 30 Peng W, Fan H. Long non-coding RNA PANDAR correlates with poor prognosis and promotes tumorigenesis in hepatocellular carcinoma. *Biomed Pharmacother*. 2015;72:113–8.
- 31 Liu YR, Tang RX, Huang WT, et al. Long noncoding RNAs in hepatocellular carcinoma: Novel insights into their mechanism. *World J Hepatol*. 2015;7(28):2781 - 2791.
- 32 Li G, Zhang H, Wan X, et al. Long noncoding RNA plays a key role in metastasis and prognosis of hepatocellular carcinoma. *Biomed Res Int*. 2016;2014(5147):780521.
- 33 Huang JL, Zheng L, Hu YW, Wang Q. Characteristics of long non-coding RNA and its relation to hepatocellular carcinoma. *Carcinogenesis*. 2014;35(3):507.
- 34 Kenji T, Irene Y, Hiroaki H, Tushar P. Long noncoding RNA in liver diseases. *Hepatology*. 2014;60(2):744 - 753.
- 35 Yuan JH, Yang F, Wang F, et al. A long non-coding RNA activated by TGF-beta promotes the invasion-metastasis cascade in hepatocellular carcinoma. *Cancer Cell*. 2014;25(5):666–81.
- 36 Huang X, Gao Y, Qin J, et al. lncRNA MIAT promotes proliferation and invasion of HCC cells via sponging miR-214. *Am J Physiol Gastrointest Liver Physiol*, 2018, 314(5): G559-G565.
- 37 Pan W, Li W, Zhao J, et al. lnc RNA - PDPK 2P promotes hepatocellular carcinoma progression through the PDK1/AKT/Caspase 3 pathway. *Molecular oncology*, 2019, 13(10): 2246-2258.
- 38 Wang Y, Yang L, Chen T, et al. A novel lncRNA MCM3AP-AS1 promotes the growth of hepatocellular carcinoma by targeting miR-194-5p/FOXA1 axis[J]. *Molecular cancer*, 2019, 18(1): 1-16.
- 39 Chen J, Huang X, Wang W, et al. LncRNA CDKN2BAS predicts poor prognosis in patients with hepatocellular carcinoma and promotes metastasis via the miR-153-5p/ARHGAP18 signaling axis. *Aging (Albany NY)*, 2018, 10(11): 3371.
- 40 Wang H, Huo X, Yang XR, et al. STAT3-mediated upregulation of lncRNA HOXD-AS1 as a ceRNA facilitates liver cancer metastasis by regulating SOX4. *Molecular Cancer*, 2017, 16(1):136.
- 41 Kang CL, Qi B, Cai QQ, et al. LncRNA AY promotes hepatocellular carcinoma metastasis by stimulating ITGAV transcription. *Theranostics*, 2019, 9(15).
- 42 Yang Y, Chen Q, Piao H Y, et al. HNRNPAB - regulated lncRNA - ELF209 inhibits the malignancy of hepatocellular carcinoma. *International journal of cancer*, 2020, 146(1): 169-180.
- 43 Feng J, Yang G, Liu Y, et al. LncRNA PCNAP1 modulates hepatitis B virus

- replication and enhances tumor growth of liver cancer. *Theranostics*, 2019, 9(18).
- 44 Yz A, Lin HA, Yw A, et al. LncRNA ID2-AS1 suppresses tumor metastasis by activating the HDAC8/ID2 pathway in hepatocellular carcinoma. *Cancer Letters*, 2020, 469:399-409.
- 45 Sheng JQ, Wang MR, Fang D, et al. LncRNA NBR2 inhibits tumorigenesis by regulating autophagy in hepatocellular carcinoma. *Biomedicine & Pharmacotherapy*, 2021, 133:111023.
- 46 Tian X, Wu Y, Yang Y, et al. Long noncoding RNA LINC00662 promotes M2 macrophage polarization and hepatocellular carcinoma progression via activating Wnt/ $\beta$  - catenin signaling. *Molecular oncology*, 2020, 14(2): 462-483.
- 47 He J, Zuo Q, Hu B, et al. A novel, liver-specific long noncoding RNA LINC01093 suppresses HCC progression by interaction with IGF2BP1 to facilitate decay of GLI1 mRNA. *Cancer letters*, 2019, 450: 98-109.
- 48 Wang YL, Liu JY, Yang JE, et al. Lnc-UCID promotes G1/S transition and hepatoma growth by preventing DHX9-mediated CDK6 down-regulation. *Hepatology*, 2019, 70(1): 259-275.
- 49 Liu J, Xu R, Mai SJ, et al. LncRNA CSMD1-1 promotes the progression of Hepatocellular Carcinoma by activating MYC signaling. *Theranostics*, 2020, 10(17):7527-7544.
50. Ma X, Mo M, Tan C, et al. Liver-specific LINC01146, a promising prognostic indicator, inhibits the malignant phenotype of hepatocellular carcinoma cells both in vitro and in vivo[J]. *Journal of translational medicine*, 2022, 20(1): 1-18.
51. Liu Y, Geng X. Long non-coding RNA (lncRNA) CYTOR promotes hepatocellular carcinoma proliferation by targeting the microRNA-125a-5p/LASP1 axis[J]. *Bioengineered*, 2022, 13(2): 3666-3679.
- 52 Wang B, Li J, Liu Y, et al. MicroRNA-200b suppresses the invasion and migration of hepatocellular carcinoma by downregulating RhoA and circRNA\_000839. *Tumor Biology*, 2017, 39(7): 1010428317719577.
- 53 Guan Z, Tan J, Gao W, et al. Circular RNA hsa\_circ\_0016788 regulates hepatocellular carcinoma tumorigenesis through miR - 486/CDK4 pathway. *J Cell Physiol*. 2019;234(1):500–508.
- 54 Zhu Q, Lu G, Luo Z, et al. CircRNA circ\_0067934 promotes tumor growth and metastasis in hepatocellular carcinoma through regulation of miR - 1324/FZD5/Wnt/beta - catenin axis. *Biochem Biophys Res Comm*. 2018;497(2):626 - 632.
- 55 Wang M, Yu F, Li P. Circular RNAs: characteristics, function and clinical significance in hepatocellular carcinoma. *Cancers*. 2018;10(8):258.
- 56 Chen G, Shi Y, Liu M, Sun J. circHIPK3 regulates cell proliferation and migration by sponging miR-124 and regulating AQP3 expression in hepatocellular carcinoma. *Cell Death Dis*. 2018;9(2):175.
- 57 Meng J, Chen S, Han JX, et al. Twist1 regulates vimentin through Cul2 circular RNA to promote EMT in hepatocellular carcinoma. *Can Res*. 2018;78(15):4150 - 4162.
- 58 Sun S, Gao J, Zhou S, et al. A novel circular RNA circ-LRIG3 facilitates the

malignant progression of hepatocellular carcinoma by modulating the EZH2/STAT3 signaling. *J Exp Clin Cancer Res*, 2020, 39(1): 1-13.

59 Wang L, Long H, Zheng Q, et al. Circular RNA circRHOT1 promotes hepatocellular carcinoma progression by initiation of NR2F6 expression. *Molecular Cancer*, 2019, 18(1).

60 Yu J, Xu Q, Wang Z, et al. Circular RNA cSMARCA5 inhibits growth and metastasis in hepatocellular carcinoma. *Journal of hepatology*, 2018, 68(6): 1214-1227.

61 Lei Y, Gong X, Lei S, et al. The Circular RNA Cdr1as Act as an Oncogene in Hepatocellular Carcinoma through Targeting miR-7 Expression. *plos one*, 2016, 11(7):e0158347.

62 Gong Y, Mao J, Wu D, et al. Circ-ZEB1.33 promotes the proliferation of human HCC by sponging miR-200a-3p and upregulating CDK6. *Cancer Cell International*, 2018, 18(1):116-.

63 Xu L, Feng X, Hao X, et al. CircSETD3 (Hsa\_circ\_0000567) acts as a sponge for microRNA-421 inhibiting hepatocellular carcinoma growth. *J Exp Clin Cancer Res*, 2019, 38(1): 1-15.

64 Han D, Li J, Wang H, et al. Circular RNA circMTO1 acts as the sponge of microRNA-9 to suppress hepatocellular carcinoma progression. *Hepatology*, 2017, 66(4): 1151-1164.

65 Bai N, Peng E, Qiu X, et al. circFBLIM1 act as a ceRNA to promote hepatocellular cancer progression by sponging miR-346. *J Exp Clin Cancer Res*, 2018, 37(1): 1-9.

66 Zhang X, Luo P, Jing W, et al. circsMaD2 inhibits the epithelial-mesenchymal transition by targeting mir-629 in hepatocellular carcinoma. *OncoTargets Ther*, 2018, 11: 2853.

67 Liu Z, Yu Y, Huang Z, et al. CircRNA-5692 inhibits the progression of hepatocellular carcinoma by sponging miR-328-5p to enhance DAB2IP expression. *Cell Death & Disease*, 2019, 10(12).

68 Huang XY, Huang ZL, Huang J, et al. Exosomal circRNA-100338 promotes hepatocellular carcinoma metastasis via enhancing invasiveness and angiogenesis. *J Exp Clin Cancer Res*, 2020, 39(1): 1-16.

69 Huang G, Liang M, Liu H, et al. CircRNA hsa\_circRNA\_104348 promotes hepatocellular carcinoma progression through modulating miR-187-3p/RTKN2 axis and activating Wnt/ $\beta$ -catenin pathway. *Cell death & disease*, 2020, 11(12): 1-14.

70 Yu J, Yang M, Zhou B, et al. CircRNA-104718 acts as competing endogenous RNA and promotes hepatocellular carcinoma progression through microRNA-218-5p/TXNDC5 signaling pathway. *Clinical Science*, 2019, 133(13):CS20190394.

71 Ding B, Fan W, Lou W. hsa\_circ\_0001955 Enhances In Vitro Proliferation, Migration, and Invasion of HCC Cells through miR-145-5p/NRAS Axis. *Mol Ther Nucleic Acids*, 2020, 22:445-455.

72 Yao Z, Xu R, Yuan L, et al. Circ\_0001955 facilitates hepatocellular carcinoma (HCC) tumorigenesis by sponging miR-516a-5p to release TRAF6 and MAPK11.



Cell Death & Disease, 2019, 10(12):945.

73 Hu ZQ, Zhou SL, Li J, et al. Circular RNA sequencing identifies CircASAP1 as a key regulator in hepatocellular carcinoma metastasis. *Hepatology*, 2020, 72(3): 906-922.

74 Zhan W, Liao X, Chen Z, et al. Circular RNA hsa\_circRNA\_103809 promoted hepatocellular carcinoma development by regulating miR-377-3p/FGFR1/ERK axis. *Journal of cellular physiology*, 2020, 235(2): 1733-1745.

75 Chen W, Quan Y, Fan S, et al. Exosome-transmitted circular RNA hsa\_circ\_0051443 suppresses hepatocellular carcinoma progression. *Cancer letters*, 2020, 475: 119-128.

76 Liu D, Kang H, Gao M, et al. Exosome-transmitted circ\_MMP2 promotes hepatocellular carcinoma metastasis by upregulating MMP2. *Molecular oncology*, 2020, 14(6): 1365-1380.

77 Zhang PF, Wei CY, Huang XY, et al. Circular RNA circTRIM33-12 acts as the sponge of MicroRNA-191 to suppress hepatocellular carcinoma progression. *Molecular cancer*, 2019, 18(1): 1-15.

78 Liu Q, Wang C, Jiang Z, et al. circRNA 001306 enhances hepatocellular carcinoma growth by up - regulating CDK16 expression via sponging miR - 584 - 5p. *J Cell Mol Med*, 2020, 24(24): 14306-14315.

79 Zhao Z, Song J, Tang B, et al. CircSOD2 induced epigenetic alteration drives hepatocellular carcinoma progression through activating JAK2/STAT3 signaling pathway. *J Exp Clin Cancer Res*, 2020, 39(1):259.

80 Li P, Song R, Yin F, et al. circMRPS35 promotes malignant progression and cisplatin resistance in hepatocellular carcinoma[J]. *Molecular Therapy*, 2022, 30(1): 431-447.

81 Liu D, Liu W, Chen X, et al. circKCNN2 suppresses the recurrence of hepatocellular carcinoma at least partially via regulating miR - 520c - 3p/methyl - DNA - binding domain protein 2 axis[J]. *Clinical and Translational Medicine*, 2022, 12(1): e662.

82 Law PT, Qin H, Ching AK, et al. Deep sequencing of small RNA transcriptome reveals novel non-coding RNAs in hepatocellular carcinoma. *J Hepatol*, 2013, 58(6): 1165-1173.

83 Xu G, Yang F, Ding CL, et al. Small nucleolar RNA 113-1 suppresses tumorigenesis in hepatocellular carcinoma. *Mol Cancer*, 2014, 13(1): 1-14.

84 Fang X, Yang D, Luo H, et al. SNORD126 promotes HCC and CRC cell growth by activating the PI3K-AKT pathway through FGFR2. *J Mol Cell Biol*, 2017, 9(3): 243-255.

**Table 2: miRNAs, circRNAs, etc. regulate HCC metabolic reprogramming.**

| NcRNA category | NcRNA name  | Targets            | Ref   |
|----------------|-------------|--------------------|-------|
| miRNA          | miR-122     | PKM2, G6PD, CAT1   | 1-3   |
|                | miR-7       | PI3K/Akt/mTOR      | 4     |
|                | miR-125a    | HK2, PI3K/Akt/mTOR | 5-6   |
|                | miR-202     | HK2                | 7     |
|                | miR-33b     | G6PC, PCK1         | 8     |
|                | miR-34a     | HK2, PDK1, LDHA    | 9-10  |
|                | miR-520     | PFK                | 11    |
|                | miR-326     | PKM2               | 12    |
|                | miR-133     | PKM2               | 13    |
|                | miR-143     | HK2                | 14    |
|                | miR-155     | HK2                | 15    |
|                | miR-223     | GLUT4              | 16    |
|                | miR-376b    | ATG4C, BECN1       | 17    |
|                | miR-195-5p  | GLUT3              | 18    |
|                | miR-22      | GLUT1              | 19    |
|                | miR-1291    | GLUT1              | 20    |
|                | miR-340     | GLUT1              | 21    |
|                | miR-205     | ACSL1              | 22    |
|                | miR-199a    | HK2, PKM2          | 23-24 |
|                | let-7       | PDK1, LDHA         | 25-26 |
|                | miR-1207-5p | FASN               | 27    |
|                | miR-449     | SIRT1, SREBP-1     | 28    |
|                | miR-342-3p  | IGF-1R             | 29    |
|                | miR-130b    | PTEN               | 30    |
|                | miR-181a    | ATG5               | 31    |
|                | miR-885-5p  | HK2                | 32    |
|                | miR-455-3p  | AMPK               | 33    |
|                | miR-139-5p  | PKM2               | 34    |
|                | miR-491-5p  | PKM2               | 35    |
|                | miR-142-3p  | LDHA               | 36    |
|                | miR-383     | LDHA               | 37    |
|                | miR-100-5p  | LDHA               | 38    |
|                | miR-455-5p  | IGF-1R             | 39    |
|                | miR-125b    | p53                | 40    |
| miR-504        | p53         | 41                 |       |
| miR-1228       | p53         | 42                 |       |
|                | circMAT2B   | PKM2               | 43    |

|                |            |                  |    |
|----------------|------------|------------------|----|
| <b>circRNA</b> | circSPECC1 | TGF- $\beta$ 2   | 44 |
|                | circC3P1   | PCK1             | 45 |
|                | circRPN2   | ENO1             | 46 |
| <b>snoRNA</b>  | snoRD113-1 | ERK1,ERK2        | 47 |
|                | snoRD126   | PI3K/AKT pathway | 48 |
| <b>piRNA</b>   | piR-Hep1   | AKT              | 49 |

## References

- 1 Liu AM, Xu Z, Shek FH, Wong KF, Lee NP, Poon RT, Chen J, Luk JM. miR-122 targets pyruvate kinase M2 and affects metabolism of hepatocellular carcinoma. *PLoS One* 2014; 9: e86872
- 2 Barajas JM, Reyes R, Guerrero MJ, Jacob ST, Motiwala T and Ghoshal K. The role of miR-122 in the dysregulation of glucose-6-phosphate dehydrogenase (G6PD) expression in hepatocellular cancer. *Sci Rep* 2018; 8: 9105.
- 3 Bhattacharyya SN, Habermacher R, Martine U, Closs EI, Filipowicz W. Relief of microRNA-mediated translational repression in human cells subjected to stress. *Cell* 2006;125:1111-24.
- 4 Fang Y, Xue JL, Shen Q, Chen J, Tian L. MicroRNA-7 inhibits tumor growth and metastasis by targeting the phosphoinositide 3-kinase/Akt pathway in hepatocellular carcinoma. *Hepatology*2012; 55: 1852-1862
- 5 Tang H, Li RP, Liang P, Zhou YL, Wang GW. miR-125a inhibits the migration and invasion of liver cancer cells via suppression of the PI3K/AKT/mTOR signaling pathway. *Oncol Lett* 2015; 10: 681-686
- 6 Jin F, Wang Y, Zhu Y, et al. The miR-125a/HK2 axis regulates cancer cell energy metabolism reprogramming in hepatocellular carcinoma. *Sci Rep*, 2017, 7(1):3089.
- 7 Wang J, Chen J, Sun F, et al. miR-202 functions as a tumor suppressor in hepatocellular carcinoma by targeting HK2. *Oncology letters*, 2020, 19(3): 2265-2271.
- 8 Ramirez CM, Goedeke L, Rotllan N, et al. MicroRNA 33 regulates glucose metabolism. *Mol Cell Biol*. 2013;33:2891–902.
- 9 Kaller M, Liffers ST, Oeljeklaus S, Kuhlmann K, Röh S, Hoffmann R, Warscheid B, Hermeking H. Genome-wide characterization of miR-34a induced changes in protein and mRNA expression by a combined pulsed SILAC and microarray analysis. *Mol Cell Proteomics* 2011; 10: M111.010462
- 10 Kim HR, Roe JS, Lee JE, Cho EJ, Youn HD. p53 regulates glucose metabolism by miR-34a. *Biochem Biophys Res Commun* 2013; 437: 225-231
- 11 Park YY, Kim SB, Han HD, Sohn BH, Kim JH, Liang J, Lu Y, Rodriguez-Aguayo C, Lopez-Berestein G, Mills GB, Sood AK, Lee JS. Tat-activating regulatory DNA-binding protein regulates glycolysis in hepatocellular carcinoma by regulating the platelet isoform of phosphofructokinase through microRNA 520. *Hepatology* 2013; 58: 182-191
- 12 Kefas B, Comeau L, Erdle N, Montgomery E, Amos S, Purow B. Pyruvate kinase M2 is a target of the tumor-suppressive microRNA-326 and regulates the survival of glioma cells. *Neuro Oncol* 2010; 12: 1102-1112

- 13 Wong T S, Liu X B, Chung - Wai Ho A, et al. Identification of pyruvate kinase type M2 as potential oncoprotein in squamous cell carcinoma of tongue through microRNA profiling[J]. *International Journal of Cancer*, 2008, 123(2): 251-257.
- 14 Peschiaroli A, Giacobbe A, Formosa A, Markert EK, BongiornoBorbone L, Levine AJ, Candi E, D'Alessandro A, Zolla L, Finazzi Agrò A, Melino G. miR-143 regulates hexokinase 2 expression in cancer cells. *Oncogene* 2013; 32: 797-802
- 15 Jiang S, Zhang LF, Zhang HW, Hu S, Lu MH, Liang S, Li B, Li Y, Li D, Wang ED, Liu MF. A novel miR-155/miR-143 cascade controls glycolysis by regulating hexokinase 2 in breast cancer cells. *EMBO J* 2012; 31: 1985-1998
- 16 Lu H, Buchan RJ, Cook SA. MicroRNA-223 regulates Glut4 expression and cardiomyocyte glucose metabolism. *Cardiovasc Res* 2010; 86: 410-420
- 17 Korkmaz G, le Sage C, Tekirdag KA, Agami R, Gozuacik D. miR-376b controls starvation and mTOR inhibition-related autophagy by targeting ATG4C and BECN1. *Autophagy* 2012;8:165-76.
- 18 Fei X, Qi M, Wu B, Song Y, Wang Y, Li T. MicroRNA-195-5p suppresses glucose uptake and proliferation of human bladder cancer T24 cells by regulating GLUT3 expression. *FEBS Lett* 2012; 586: 392-397
- 19 Chen B, Tang H, Liu X, Liu P, Yang L, Xie X, Ye F, Song C, Xie X, Wei W. miR-22 as a prognostic factor targets glucose transporter protein type 1 in breast cancer. *Cancer Lett* 2015; 356: 410-417
- 20 Yamasaki T, Seki N, Yoshino H, Itesako T, Yamada Y, Tatarano S, Hidaka H, Yonezawa T, Nakagawa M, Enokida H. Tumorsuppressive microRNA-1291 directly regulates glucose transporter 1 in renal cell carcinoma. *Cancer Sci* 2013; 104: 1411-1419
- 21 Xu P, Li Y, Zhang H, Li M, Zhu H. MicroRNA-340 Mediates Metabolic Shift in Oral Squamous Cell Carcinoma by Targeting Glucose Transporter-1. *J Oral Maxillofac Surg* 2016; 74: 844-850
- 22 Cui M, Wang Y, Sun B, et al. MiR-205 modulates abnormal lipid metabolism of hepatoma cells via targeting acyl-CoA synthetase long-chain family member 1 (ACSL1) mRNA. *Biochem Biophys Res Commun* 2014;444(2):270-5.
- 23 Guo W, Qiu Z, Wang Z, Wang Q, Tan N, Chen T, Chen Z, Huang S, Gu J, Li J, Yao M, Zhao Y, He X (2015) MiR-199a-5p is negatively associated with malignancies and regulates glycolysis and lactate production by targeting hexokinase 2 in liver cancer. *Hepatology* 62(4):1132-1144.
- 24 Shen Q, Cicinnati V R, Zhang X, et al. Role of microRNA-199a-5p and discoidin domain receptor 1 in human hepatocellular carcinoma invasion[J]. *Molecular cancer*, 2010, 9(1): 1-12.
- 25 Ma X, Li C, Sun L, Huang D, Li T, He X, et al. Lin28/let-7 axis regulates aerobic glycolysis and cancer progression via PDK1. *Nat Commun* 2014;5:5212.
- 26 Hermeking H. MicroRNAs in the p53 network: Micromanagement of tumour suppression. *Nat. Rev. Cancer* 2012, 12, 613-626.
- 27 Zhao G, Dong L, Shi H, Li H, Lu X, Guo X, Wang J. MicroRNA-1207-5p inhibits hepatocellular carcinoma cell growth and invasion through the fatty acid synthase-mediated Akt/mTOR signalling pathway. *Oncol Rep* 2016;36:1709-16.

- 28 Zhang H, Feng Z, Huang R, Xia Z, Xiang G, Zhang J. MicroRNA-449 suppresses proliferation of hepatoma cell lines through blockade lipid metabolic pathway related to SIRT1. *Int J Oncol* 2014;45:2143-52.
- 29 Liu W, Kang L, Han J, Wang Y, Shen C, Yan Z, et al. miR-342-3p suppresses hepatocellular carcinoma proliferation through inhibition of IGF-1R-mediated Warburg effect. *Onco Targets Ther* 2018;11:1643-53.
- 30 Miao Y, Zheng W, Li N, Su Z, Zhao L, Zhou H, Jia L. MicroRNA-130b targets PTEN to mediate drug resistance and proliferation of breast cancer cells via the PI3K/Akt signaling pathway. *Sci Rep* 2017;7:41942.
- 31 Tekirdag KA, Korkmaz G, Ozturk DG, Agami R, Gozuacik D. MIR181A regulates starvation- and rapamycin-induced autophagy through targeting of ATG5. *Autophagy* 2013;9:374-85.
- 32 Xu F, Yan JJ, Gan Y, Chang Y, Wang HL, He XX and Zhao Q. miR-885-5p negatively regulates Warburg effect by silencing hexokinase 2 in liver cancer. *Mol Ther Nucleic Acids* 2019; 18: 308-319
- 33 Lin Y, Wu M, Huang Y, Yeh C, Cheng M, Chi H, Tsai C, Chung I, Chen C and Lin K. Taurine upregulated gene 1 functions as a master regulator to coordinate glycolysis and metastasis in hepatocellular carcinoma. *Hepatology* 2018; 67: 188-203.
- 34 Hua S, Lei L, Deng L, Weng X, Liu C, Qi X, Wang S, Zhang D, Zou X, Cao C, Liu L and Wu D. miR-139-5p inhibits aerobic glycolysis, cell proliferation, migration, and invasion in hepatocellular carcinoma via a reciprocal regulatory interaction with ETS1. *Oncogene* 2018; 37: 1624-1636.
- 35 Xu Q, Dou C, Liu X, Yang L, Ni C, Wang J, Guo Y, Yang W, Tong X and Huang D. Oviductus ranae protein hydrolysate (ORPH) inhibits the growth, metastasis and glycolysis of HCC by targeting miR-491-5p/PKM2 axis. *Biomed Pharmacother* 2018; 107: 1692-1704.
- 36 Hua S, Liu C, Liu L and Wu D. miR-142-3p inhibits aerobic glycolysis and cell proliferation in hepatocellular carcinoma via targeting LDHA. *Biochem Bioph Res Co* 2018; 496: 947-954.
- 37 Fang Z, He L, Jia H, Huang Q, Chen D and Zhang Z. The miR-383-LDHA axis regulates cell proliferation, invasion and glycolysis in hepatocellular cancer. *Iran J Basic Med Sci* 2017; 20: 187-192.
- 38 Zhou Y, Huang Y, Hu K, Zhang Z, Yang J and Wang Z. HIF1A activates the transcription of lncRNA RAET1K to modulate hypoxia-induced glycolysis in hepatocellular carcinoma cells via miR-100-5p. *Cell Death Dis* 2020; 11: 176.
- 39 Hu Y, Yang Z, Bao D, Ni J and Lou J. miR-455-5p suppresses hepatocellular carcinoma cell growth and invasion via IGF-1R/AKT/GLUT1 pathway by targeting IGF-1R. *Pathol Res Pract* 2019; 215: 152674.
- 40 Le MT, Teh C, Shyh-Chang N, Xie H, Zhou B, Korzh V, Lodish HF, Lim B. MicroRNA-125b is a novel negative regulator of p53. *Genes Dev* 2009; 23: 862-876
- 41 Hu W, Chan CS, Wu R, Zhang C, Sun Y, Song JS, Tang LH, Levine AJ, Feng Z. Negative regulation of tumor suppressor p53 by microRNA miR-504. *Mol Cell* 2010; 38: 689-699
- 42 Zhang Y, Dai J, Deng H, Wan H, Liu M, Wang J, Li S, Li X, Tang H. miR-1228

promotes the proliferation and metastasis of hepatoma cells through a p53 forward feedback loop. *Br J Cancer* 2015; 112: 365-374

43 Li Q, Pan X, Zhu D, et al. Circular RNA MAT2B promotes glycolysis and malignancy of hepatocellular carcinoma through the miR - 338 - 3p/PKM2 axis under hypoxic stress[J]. *Hepatology*, 2019, 70(4): 1298-1316.

44 Zhang B, Liu Z, Cao K, et al. Circ-SPECC1 modulates TGF $\beta$ 2 and autophagy under oxidative stress by sponging miR-33a to promote hepatocellular carcinoma tumorigenesis. *Cancer Medicine*, 2020, 9(16).

45 Zhong L, Wang Y, Cheng Y, Wang W, Lu B, Zhu L and Ma Y. Circular RNA circC3P1 suppresses hepatocellular carcinoma growth and metastasis through miR-4641/PCK1 pathway. *Biochem Biophys Res Commun* 2018; 499: 1044-1049.

46. Li J, Hu ZQ, Yu S, et al. CircRPN2 inhibits aerobic glycolysis and metastasis in hepatocellular carcinoma[J]. *Cancer Research*, 2022.

47 Xu G, Yang F, Ding C L, et al. Small nucleolar RNA 113–1 suppresses tumorigenesis in hepatocellular carcinoma[J]. *Molecular cancer*, 2014, 13(1): 1-14.

48 Fang X, Yang D, Luo H, et al. SNORD126 promotes HCC and CRC cell growth by activating the PI3K–AKT pathway through FGFR2[J]. *Journal of molecular cell biology*, 2017, 9(3): 243-255.

49 Law PT, Qin H, Ching AK, et al. Deep sequencing of small RNA transcriptome reveals novel non-coding RNAs in hepatocellular carcinoma. *J Hepatol*, 2013, 58(6): 1165-1173.

**Table 3: lncRNAs regulate HCC metabolic reprogramming.**

| NcRNA category | NcRNA name       | Targets               | Ref |
|----------------|------------------|-----------------------|-----|
| <b>lncRNA</b>  | lncCUDR          | p53                   | 1   |
|                | lncHOTAIR        | mTOR pathway, GLUT1   | 2   |
|                | lncHOTTIP        | GLS1                  | 3   |
|                | lncHULC          | ACSL1                 | 4   |
|                | linc01554        | PKM2, AKT/mTOR        | 5   |
|                | lncRNA-p21       | GLUT1, LDHA           | 6   |
|                | lncMVIH          | PGK1                  | 7   |
|                | lncMALAT1        | mTOR pathway, CF7L2   | 8   |
|                | lncSLC2A1-AS1    | GLUT1                 | 9   |
|                | lncWFDC21P       | PFKP, PKM2            | 10  |
|                | lincRoR          | HIF-1 $\alpha$ , PDK1 | 11  |
|                | lncRAET1K        | LDHA                  | 12  |
|                | linc00958        | HDGF                  | 13  |
|                | lncRP11-241J12.3 | PC                    | 14  |
| linc00326      | CCT3             | 15                    |     |

## References

- 1 Wu M, An J, Zheng Q, et al. Double mutant P53 (N340Q/L344R) promotes hepatocarcinogenesis through upregulation of Pim1 mediated by PKM2 and LncRNA CUDR. *Oncotarget*, 2016, 7(41): 66525.
- 2 Wei S, Fan Q, Yang L, Zhang X, Ma Y, Zong Z, Hua X, Su D, Sun H, Li H, Liu Z (2017) Promotion of glycolysis by HOTAIR through GLUT1 upregulation via mTOR signaling. *Oncol Rep* 38:1902–1908
- 3 Ge Y, Yan X, Jin Y, Yang X, Yu X, Zhou L, Han S, Yuan Q, Yang M (2015) MiRNA-192 (corrected) and miRNA-204 directly suppress lncRNA HOTTIP and interrupt GLS1-mediated glutaminolysis in hepatocellular carcinoma. *PLoS Genet* 11:e1005726
- 4 Cui M, Xiao Z, Wang Y, Zheng M, Song T, Cai X, Sun B, Ye L, Zhang X (2015) Long noncoding RNA HULC modulates abnormal lipid metabolism in hepatoma cells through an miR-9-mediated RXRA signaling pathway. *Can Res* 75:846–857
- 5 Zheng YL, Li L, Jia YX, Zhang BZ, Li JC, Zhu YH, et al. LINC01554-Mediated Glucose Metabolism Reprogramming Suppresses Tumorigenicity in Hepatocellular Carcinoma via Downregulating PKM2 Expression and Inhibiting Akt/mTOR Signaling Pathway. *Theranostics*. 2019; 9: 796-810.
- 6 Yang F, Zhang H, Mei Y, Wu M. Reciprocal regulation of HIF-1 $\alpha$  and lincRNA-p21 modulates the Warburg effect. *Mol Cell* 2014; 53: 88-100
- 7 Yuan SX, Yang F, Yang Y, et al. Long non-coding RNA associated with microvascular invasion in hepatocellular carcinoma promotes angiogenesis and serves as a predictor for hepatocellular carcinoma patients' poor recurrence-free survival after hepatectomy. *Hepatology*. 2012;56(6):2231–41.
- 8 Malakar P, Stein I, Saragovi A, et al. Long noncoding RNA MALAT1 regulates cancer glucose metabolism by enhancing mTOR-mediated translation of TCF7L2. *Cancer research*, 2019, 79(10): 2480-2493.
- 9 Shang R, Wang M, Dai B, et al. Long noncoding RNA SLC2A1-AS1 regulates aerobic glycolysis and progression in hepatocellular carcinoma via inhibiting the STAT3/FOXM1/GLUT1 pathway. *Molecular oncology*, 2020, 14(6): 1381-1396.
- 10 Guan Y, Huang Q, Ai Y, Chen Q, Zhao W, Wang X, Wu Q and Chen H. Nur77-activated lncRNA WFDC21P attenuates hepatocarcinogenesis via modulating glycolysis. *Oncogene* 2020; 39: 2408-2423.
- 11 Takahashi K, Yan IK, Haga H and Patel T. Modulation of hypoxia-signaling pathways by extracellular linc-RoR. *J Cell Sci* 2014; 127: 1585-1594.
- 12 Zhou Y, Huang Y, Hu K, Zhang Z, Yang J and Wang Z. HIF1A activates the transcription of lncRNA RAET1K to modulate hypoxia-induced glycolysis in hepatocellular carcinoma cells via miR-100-5p. *Cell Death Dis* 2020; 11: 176.
- 13 Zuo X, Chen Z, Gao W, et al. M6A-mediated upregulation of LINC00958 increases lipogenesis and acts as a nanotherapeutic target in hepatocellular carcinoma. *J Hematol Oncol*, 2020, 13(1): 1-20.
- 14 Cheng L, Hu S, Ma J, et al. Long noncoding RNA RP11-241J12. 3 targeting pyruvate carboxylase promotes hepatocellular carcinoma aggressiveness by disrupting pyruvate metabolism and the DNA mismatch repair system[J]. *Molecular biomedicine*,

2022, 3(1): 1-16.

15. Søndergaard J N, Sommerauer C, Atanasoai I, et al. CCT3-LINC00326 axis regulates hepatocarcinogenic lipid metabolism[J]. Gut, 2022.
